# Supplementary material
Source: publisher site journal article supplement (https://www.spandidos-publications.com/8227/downloadSupplementary)

Figure S1. OXA affects the viability of gastric cancer cells. (A and B) The viability of AGS and MKN45 cells treated with different concentrations of OXA for 48 h was detected by the Cell Counting Kit-8 assay. \*\*\*P<0.001. OXA, oxaliplatin.

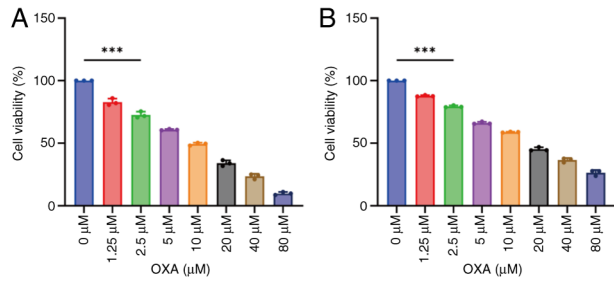

Supplement: Supplementary file 1 [file downloadSupplementary]
